# Supplementary material
Source: PubMed Central journal article supplement (PMC3646949)
Supplement: NIHMS462291-supplement-01.pdf [file NIHMS462291-supplement-01.pdf]

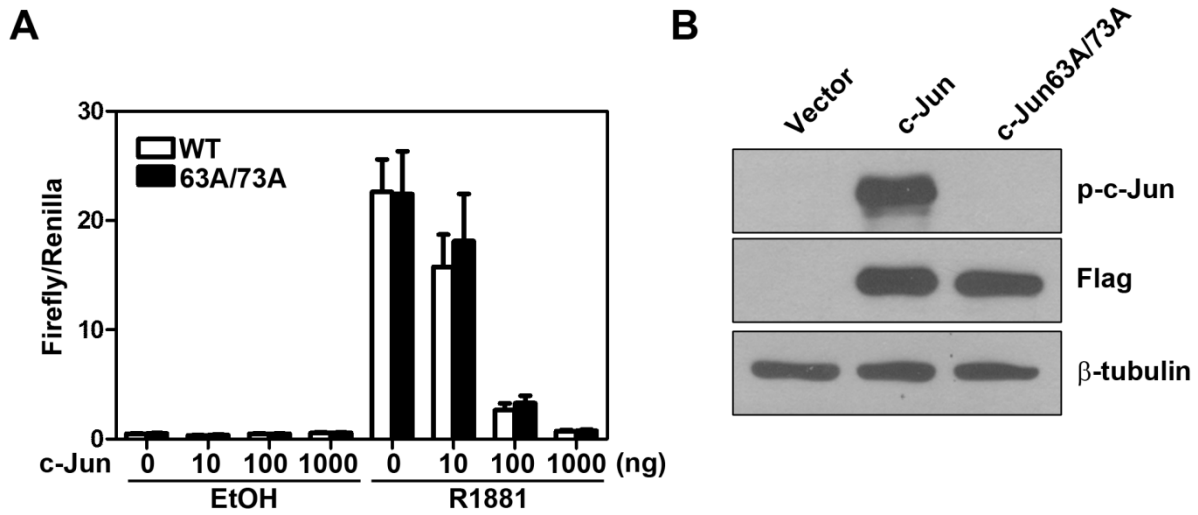

**Figure S1: Effect of c-Jun phosphorylation on its AR inhibitory function.** (A) Does effect of wild-type c-Jun or the phosphorylation-deficient mutant on androgen-induced PSA promoter activity. LNCaP cells were transfected with 0.5  $\mu$ g of luciferase reporter driven by PSA, 100 ng of pRL-TK and increasing concentrations (0, 10, 100, and 1000 ng) of pFlag-c-Jun or pFlag-c-Jun63A/73A expression vector. Empty vector (pFlag) was added to keep the same amount of transfected DNA per well. After 24 hr, cells were treated with ethanol (EtOH) or 10 nM R1881 for another 24 hr. (n=3) (B) Phosphorylation status (p-Ser-63) of exogenous Flag-c-Jun and Flag-c-Jun63A/73A in LNCaP cells was examined by anti-phospho-c-Jun antibody.

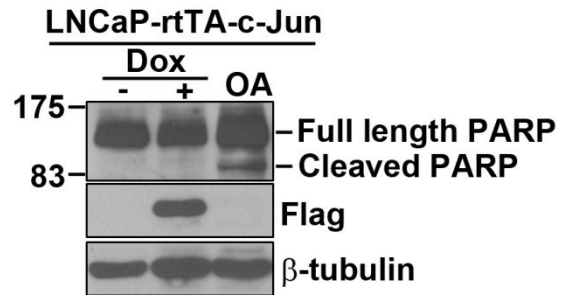

**Figure S2: Effect of c-Jun overexpression on PARP cleavage.** LNCaP-rtTA-c-Jun cells were treated with/without Dox for 3 days or okadaic acid (OA, 30nM) for 18 hr. Cleavage of PARP was analyzed by Western blot. OA was used as a positive control for PARP cleavage.
